# Supplementary material for: Doubly ortho-linked quinoxaline/triarylamine hybrid as a bifunctional, dipolar electroluminescent template for optoelectronic applications
Source: Royal Society of Chemistry journal article supplement (doi:10.1039/b506409k), 2005-01-01

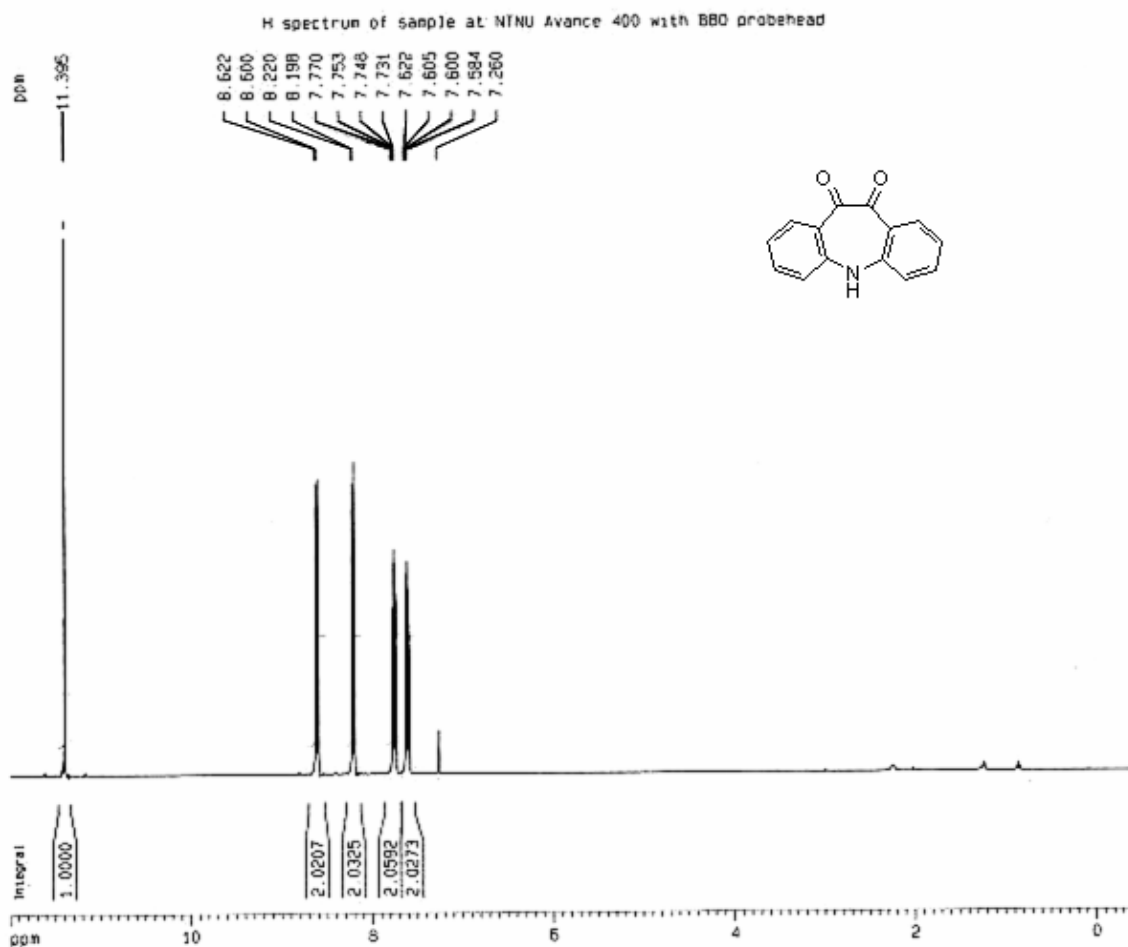

Current Data Parameters  
 NAME diketone  
 EXPNO 1  
 PROCNO 1

F2 - Acquisition Parameters  
 Date\_ 20021129  
 Time 9.08  
 INSTRUM spect  
 PROBHD 5 mm BBO BB-1H  
 PULPROG zg30  
 TD 16384  
 SOLVENT CDCl3  
 NS 17  
 DS 0  
 SWH 5995.204 Hz  
 FIDRES 0.365916 Hz  
 AQ 1.3664756 sec  
 RG 203.2  
 DM 63.400 usec  
 DE 6.50 usec  
 TE 300.0 K  
 D1 1.50000000 sec

\*\*\*\*\* CHANNEL f1 \*\*\*\*\*  
 NUC1 1H  
 P1 7.10 usec  
 PL1 0.00 dB  
 SFO1 400.1326008 MHz

F2 - Processing parameters  
 SI 16384  
 SF 400.1300081 MHz  
 HDW EM  
 SSB 0  
 LB 0.10 Hz  
 GB 0  
 PC 1.00

1D NMR plot parameters  
 CX 20.00 cm  
 CY 10.50 cm  
 F1P 12.000 ppm  
 F1 4801.56 Hz  
 F2P -0.500 ppm  
 F2 -200.06 Hz  
 SFOCM 0.62500 ppm/  
 HZCM 250.08125 Hz/c

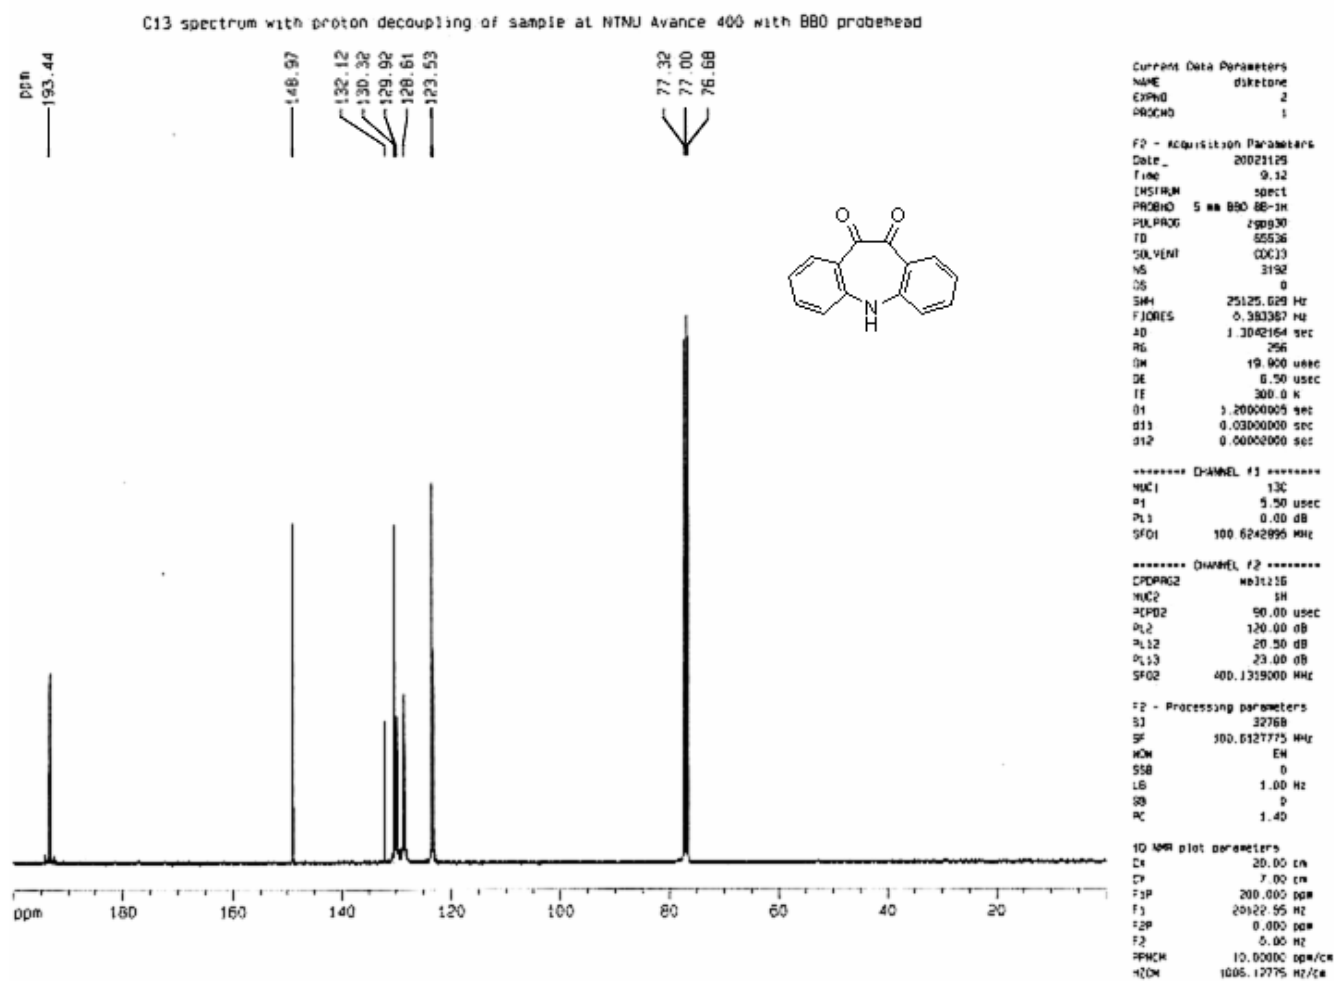

| INDEX | FREQUENCY (PPM) | HEIGHT |
|-------|-----------------|--------|
| 1     | 8.178           | 0.5    |
| 2     | 8.159           | 0.5    |
| 3     | 8.145           | 0.6    |
| 4     | 8.132           | 0.9    |
| 5     | 8.094           | 0.7    |
| 6     | 7.754           | 0.5    |
| 7     | 7.737           | 0.5    |
| 8     | 7.722           | 8.4    |
| 9     | 7.705           | 0.4    |
| 10    | 7.375           | 0.3    |
| 11    | 7.339           | 0.6    |
| 12    | 7.300           | 0.6    |
| 13    | 7.253           | 0.7    |
| 14    | 7.214           | 0.7    |
| 15    | 7.177           | 0.3    |
| 16    | 6.938           | 0.7    |
| 17    | 6.899           | 0.6    |
| 18    | 5.474           | 0.3    |

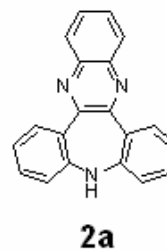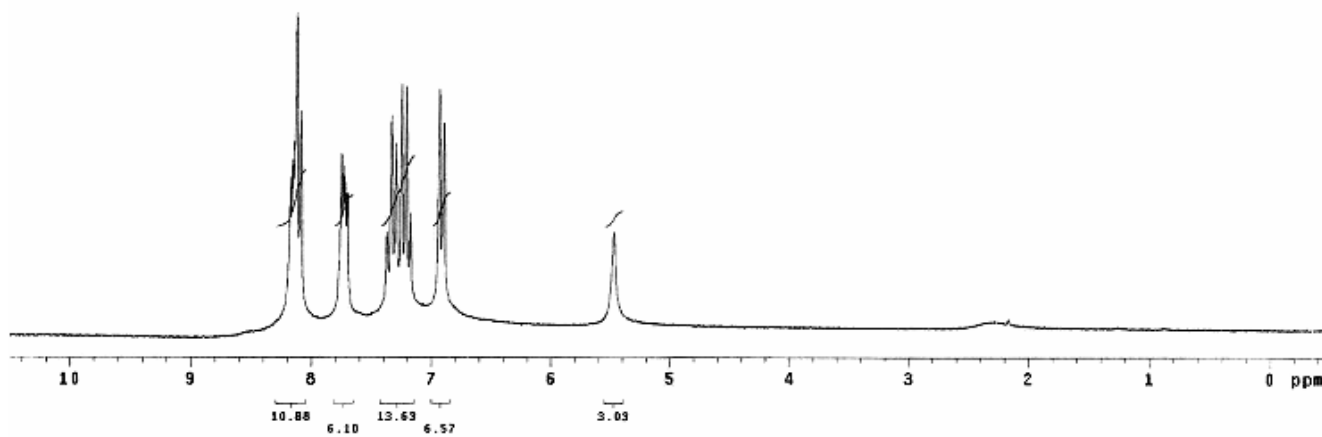

| INDEX | FREQUENCY (PPM) | HEIGHT |
|-------|-----------------|--------|
| 1     | 152.633         | 0.2    |
| 2     | 150.737         | 0.4    |
| 3     | 141.708         | 0.4    |
| 4     | 132.014         | 0.7    |
| 5     | 130.800         | 0.8    |
| 6     | 129.845         | 0.8    |
| 7     | 129.708         | 0.4    |
| 8     | 128.298         | 0.8    |
| 9     | 124.216         | 0.8    |
| 10    | 118.770         | 0.8    |
| 11    | 77.637          | 0.8    |
| 12    | 77.000          | 0.8    |
| 13    | 76.363          | 0.8    |

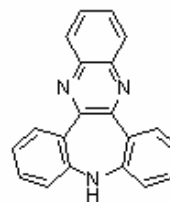

**2a**

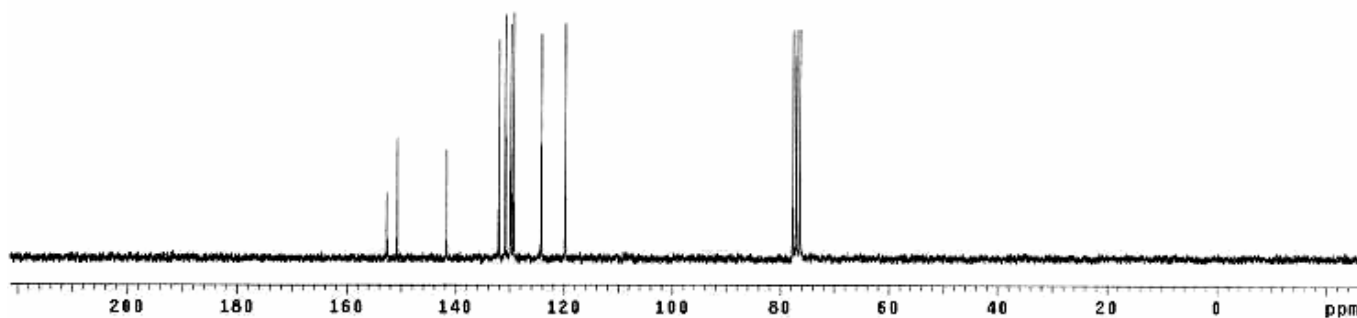

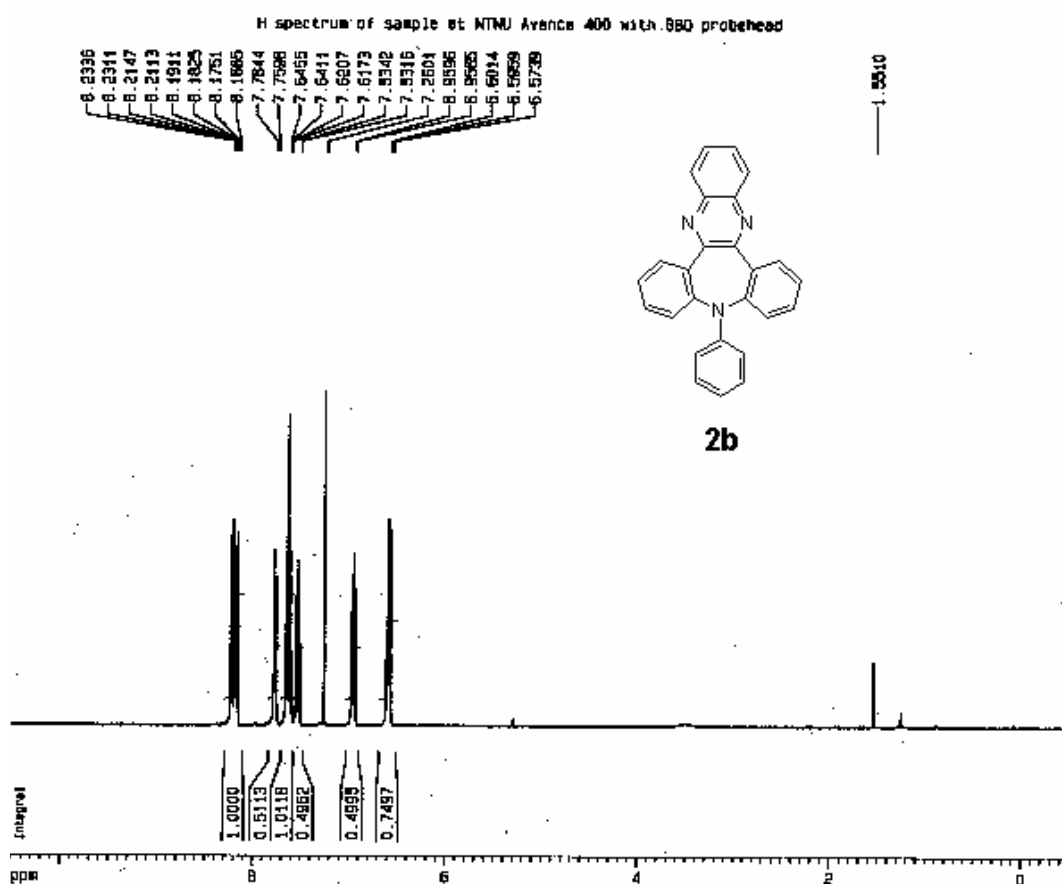

Current Data Parameters  
 NAME 9-2  
 EXPRM 3  
 PROCNO 3

F2 - Acquisition Parameters  
 Date\_ 20021104  
 Time 9.54  
 INSTRUM spect  
 PROBNM 9 == 060 09-1H  
 PULPROG zg30  
 TD 16384  
 SOLVENT CDCl3  
 NS 16  
 DS 0  
 SSBH 5295.204 Hz  
 FIDRES 0.362918 Hz  
 AQ 1.3684756 sec  
 RG 812.7  
 DW 83.490 usec  
 DE 8.50 usec  
 TE 300.0 K  
 DA 1.90000000 sec

CHANNEL f1  
 NUCL1 1H  
 P1 7.10 usec  
 PL1 0.00 dB  
 SFO1 400.1326605 MHz

F2 - Processing parameters  
 SI 16384  
 SF 400.1300591 MHz  
 MD 0  
 SSB 0  
 LB 0.10 Hz  
 GB 0  
 PC 1.00

1D NMR plot parameters  
 CX 20.00 cm  
 CY 6.00 cm  
 F1P 10.500 ppm  
 F1 4204.37 Hz  
 F2P -0.500 ppm  
 F2 -200.06 Hz  
 PPMCH 0.56000 ppm/cm  
 HZCH 228.07150 Hz/cm

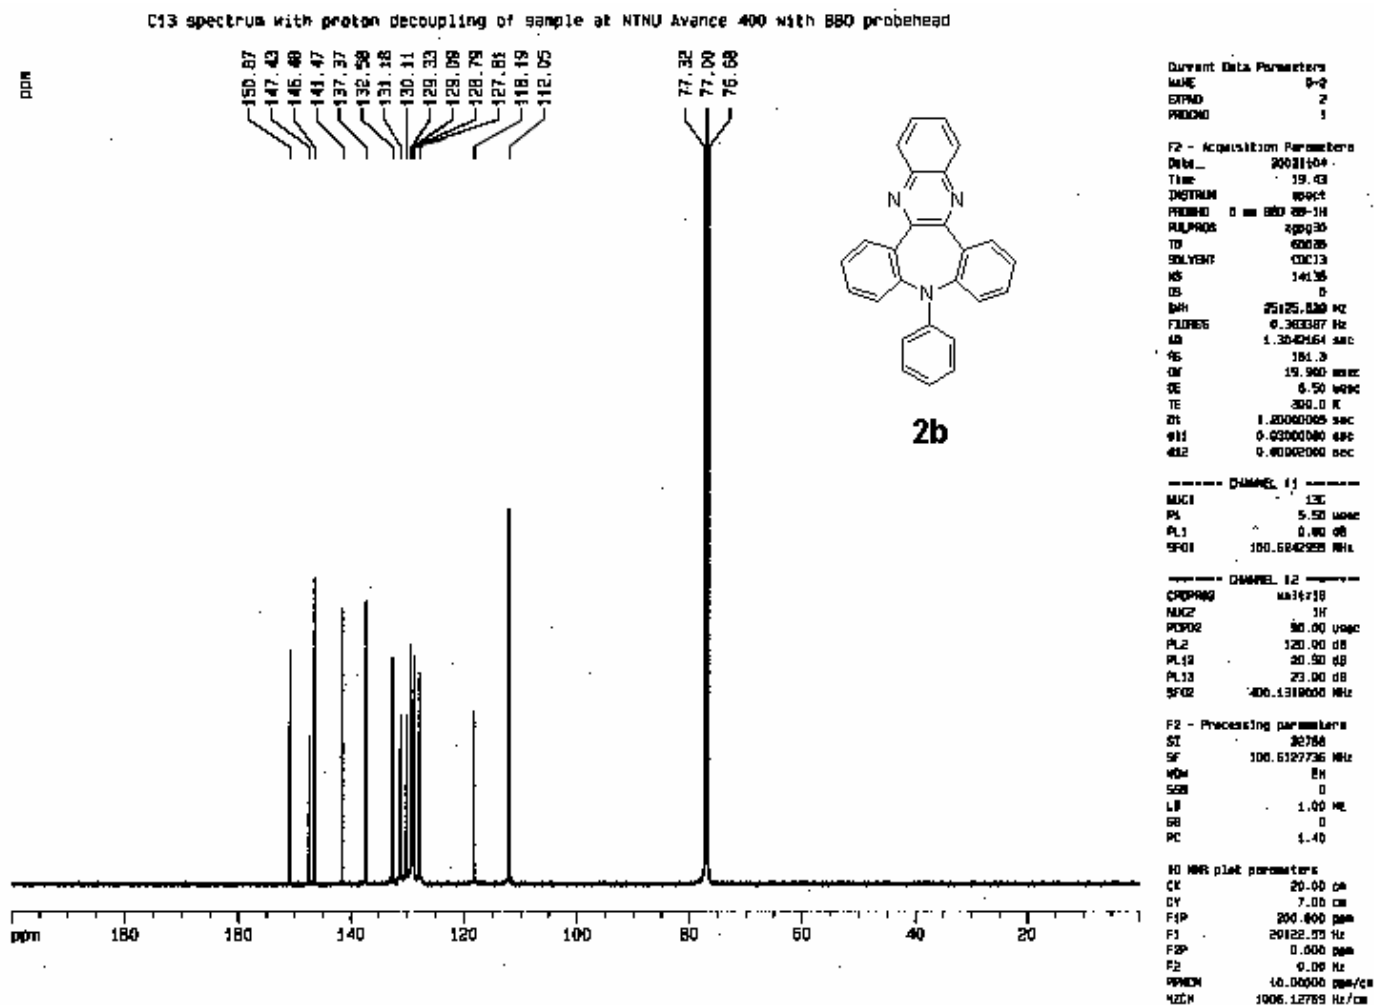

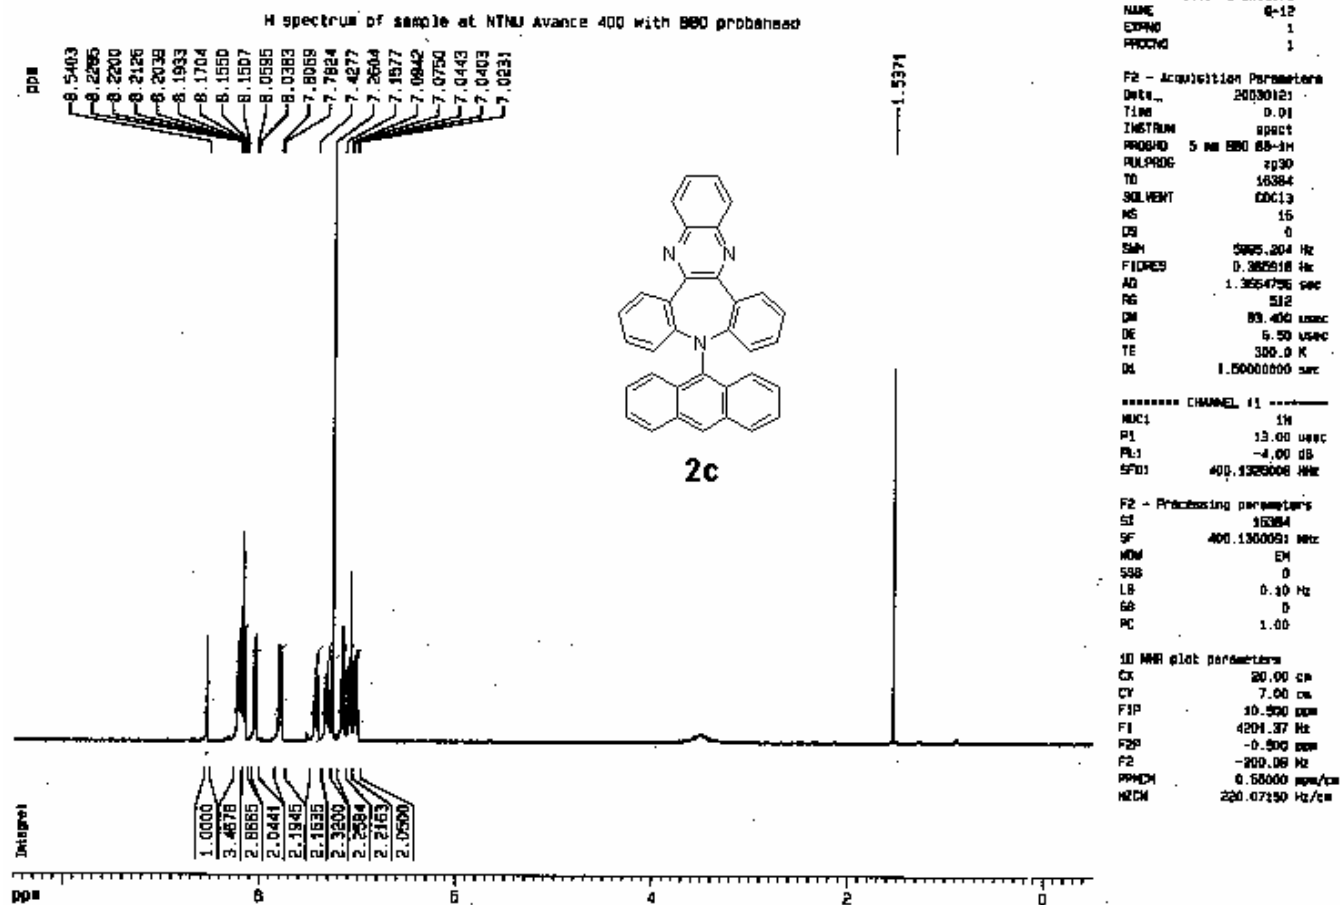

| INDEX | FREQUENCY (PPM) | HEIGHT |
|-------|-----------------|--------|
| 1     | 153.786         | 0.1    |
| 2     | 151.988         | 0.2    |
| 3     | 142.225         | 0.2    |
| 4     | 136.687         | 0.1    |
| 5     | 132.581         | 0.3    |
| 6     | 132.376         | 0.2    |
| 7     | 132.302         | 0.2    |
| 8     | 131.347         | 0.2    |
| 9     | 130.042         | 0.3    |
| 10    | 129.920         | 0.3    |
| 11    | 128.496         | 0.4    |
| 12    | 128.848         | 0.3    |
| 13    | 128.206         | 0.2    |
| 14    | 128.840         | 0.3    |
| 15    | 125.520         | 0.3    |
| 16    | 125.469         | 0.4    |
| 17    | 124.282         | 0.3    |
| 18    | 122.547         | 0.3    |
| 19    | 77.637          | 1.2    |
| 20    | 77.000          | 1.2    |
| 21    | 76.363          | 1.2    |

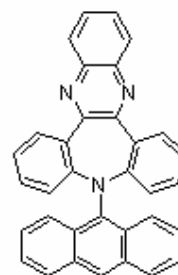

**2c**

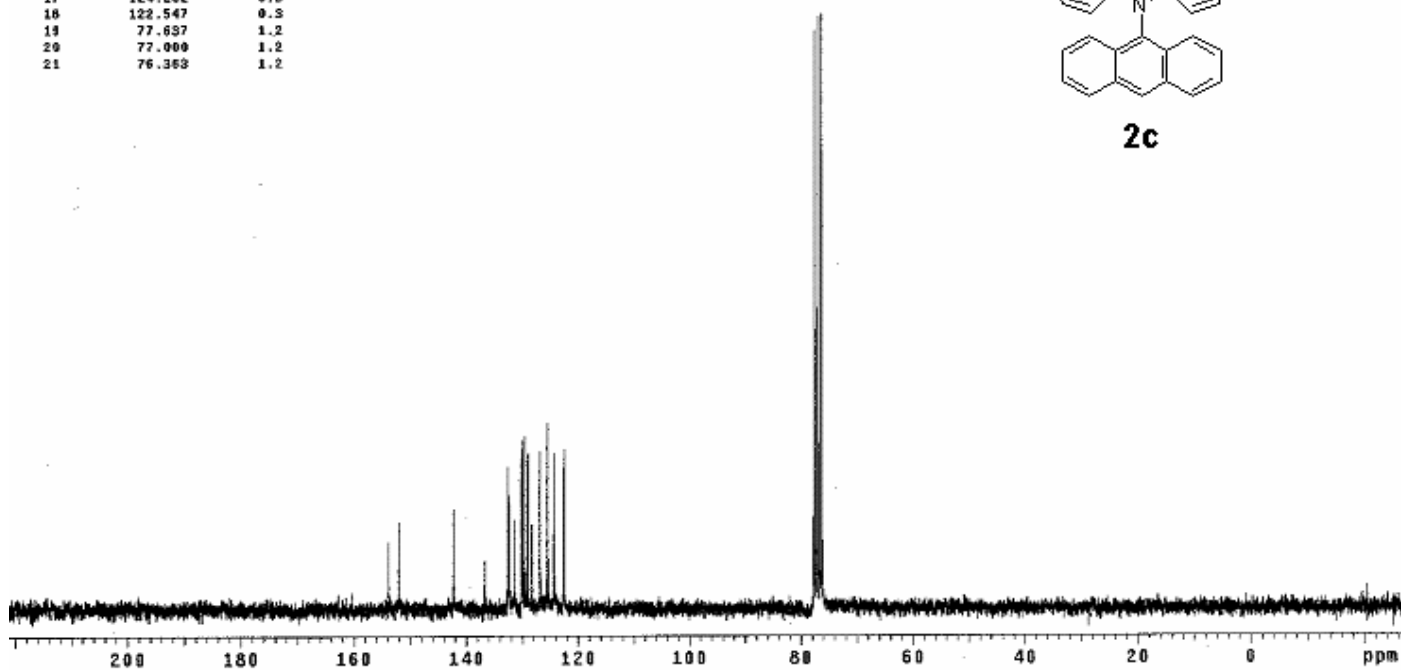



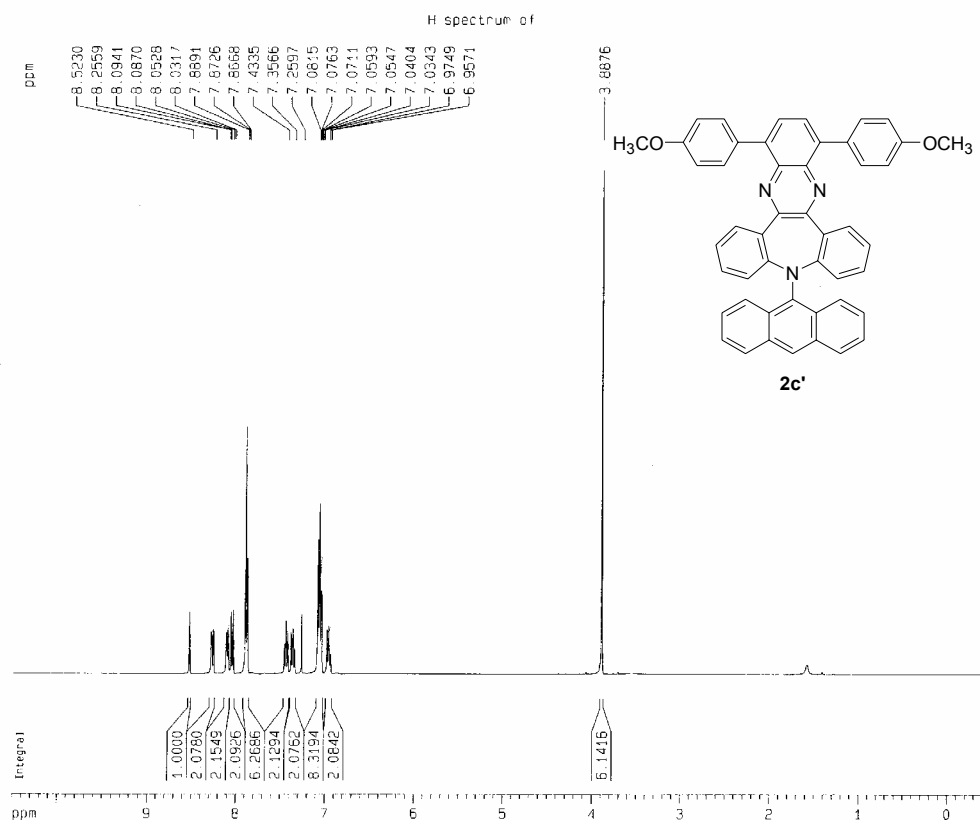

```

Current Data Parameters
NAME      OCH3-An-3
EXPNO    1
PROCNO   1

F2 - Acquisition Parameters
Date_    20050224
Time     19.00
INSTRUM spect
PROBHD   5 mm BBO BB-1H
PULPROG  zg30
TD        6536
SOLVENT  CDCl3
NS        16
DS        0
SWH       5995.204 Hz
FIDRES   0.365910 Hz
AQ        1.3664756 sec
RG         263.2
DW         83.400 usec
DE         6.50 usec
TE         300.0 K
D1         1.50000000 sec

===== CHANNEL f1 =====
NUC1      1H
P1        10.10 usec
PL1       3.00 dB
SF01     400.1326008 MHz

F2 - Processing parameters
SI        16384
SF        400.1300088 MHz
WDW       EM
SSB       0
LB        0.10 Hz
GB        0
PC        1.00

1D NMR plot parameters
CX        20.00 cm
CY        10.50 cm
T1P       10.500 ppm
F1        4201.37 Hz
F2P       -0.500 ppm
F2        -200.07 Hz
PRMCM     0.55000 ppm/cm
HZCM      220.07152 Hz/cm
    
```

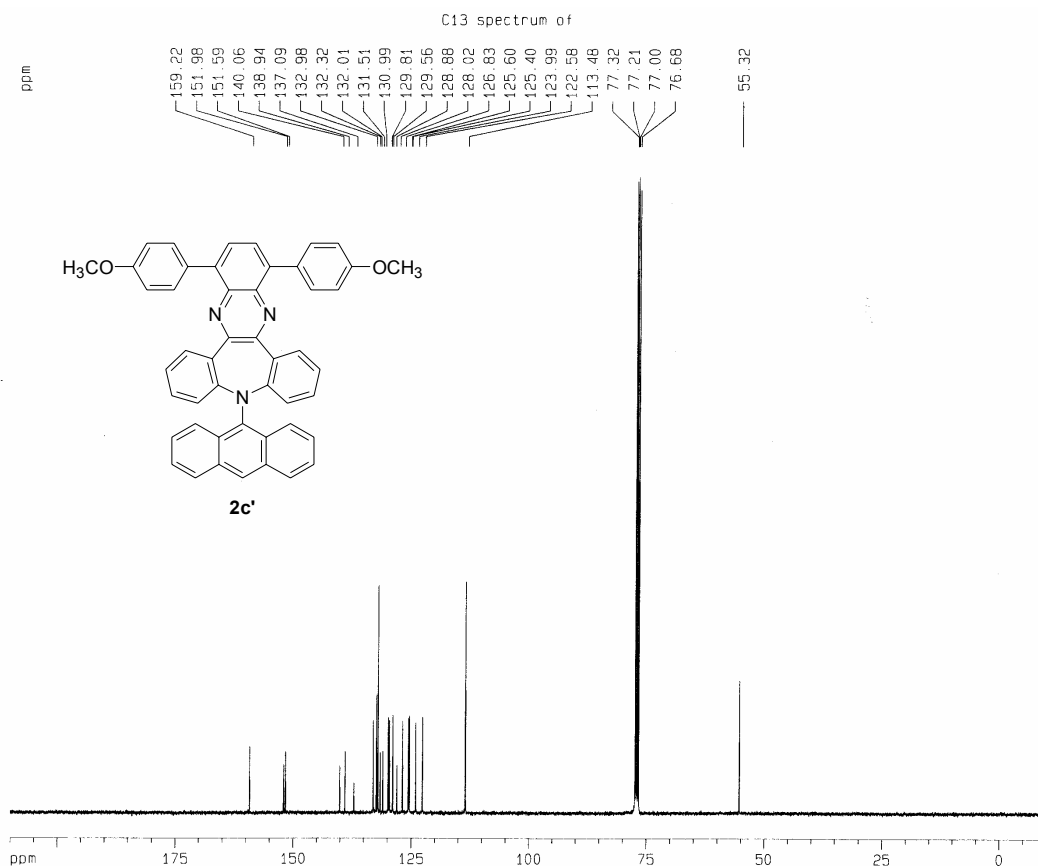

```

Current Data Parameters
NAME      OCH3-An-3
EXPNO    2
PROCNO   1

F2 - Acquisition Parameters
Date_    20050224
Time     19.02
INSTRUM spect
PROBHD   5 mm BBO BB-1H
PULPROG  zgpg30
TD        6536
SOLVENT  CDCl3
NS        3776
DS        0
SWH       25125.629 Hz
FIDRES   0.383387 Hz
AQ        1.3042164 sec
RG         8000
DW         19.900 usec
DE         6.50 usec
TE         300.0 K
D1         1.20000005 sec
d11       0.03000000 sec
d12       0.00002000 sec

===== CHANNEL f1 =====
NUC1      13C
P1        10.80 usec
PL1       7.00 dB
SF01     100.6242995 MHz

===== CHANNEL f2 =====
CPDPRG2  waltz16
NUC2      1H
PCPD2    90.00 usec
PL2      3.00 dB
PL12     21.83 dB
PL13     24.80 dB
SF02     400.1319000 MHz

F2 - Processing parameters
SI        32768
SF        100.6127721 MHz
WDW       EM
SSB       0
LB        1.00 Hz
GB        0
PC        1.40

1D NMR plot parameters
CX        20.00 cm
CY        12.50 cm
F1P       210.000 ppm
F1        21128.68 Hz
F2P       -10.000 ppm
F2        -1006.13 Hz
PRMCM     11.00000 ppm/cm
HZCM      1106.74048 Hz/cm
    
```

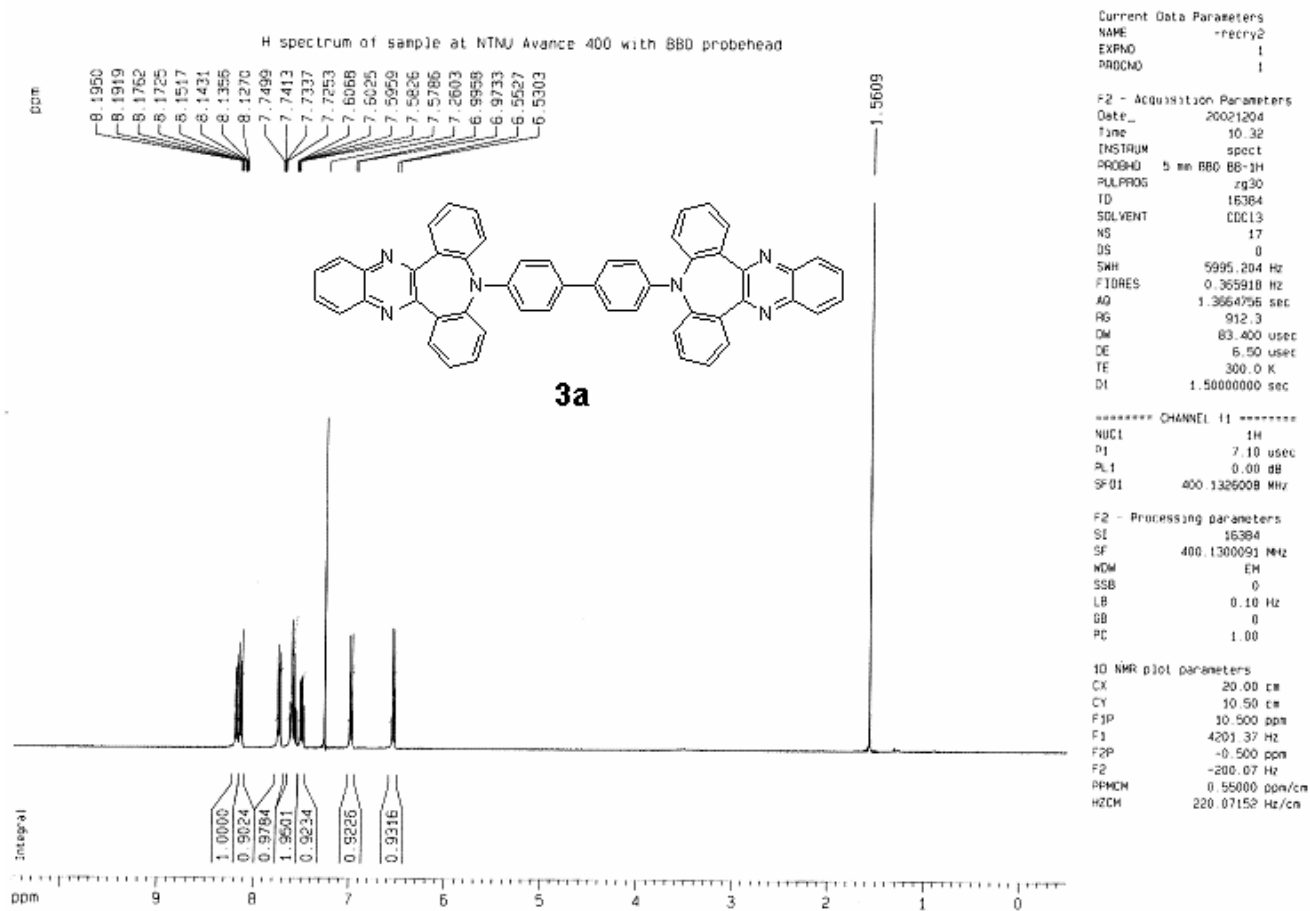

C13 spectrum with proton decoupling of sample at NTNU Avance 400 with BBO probehead

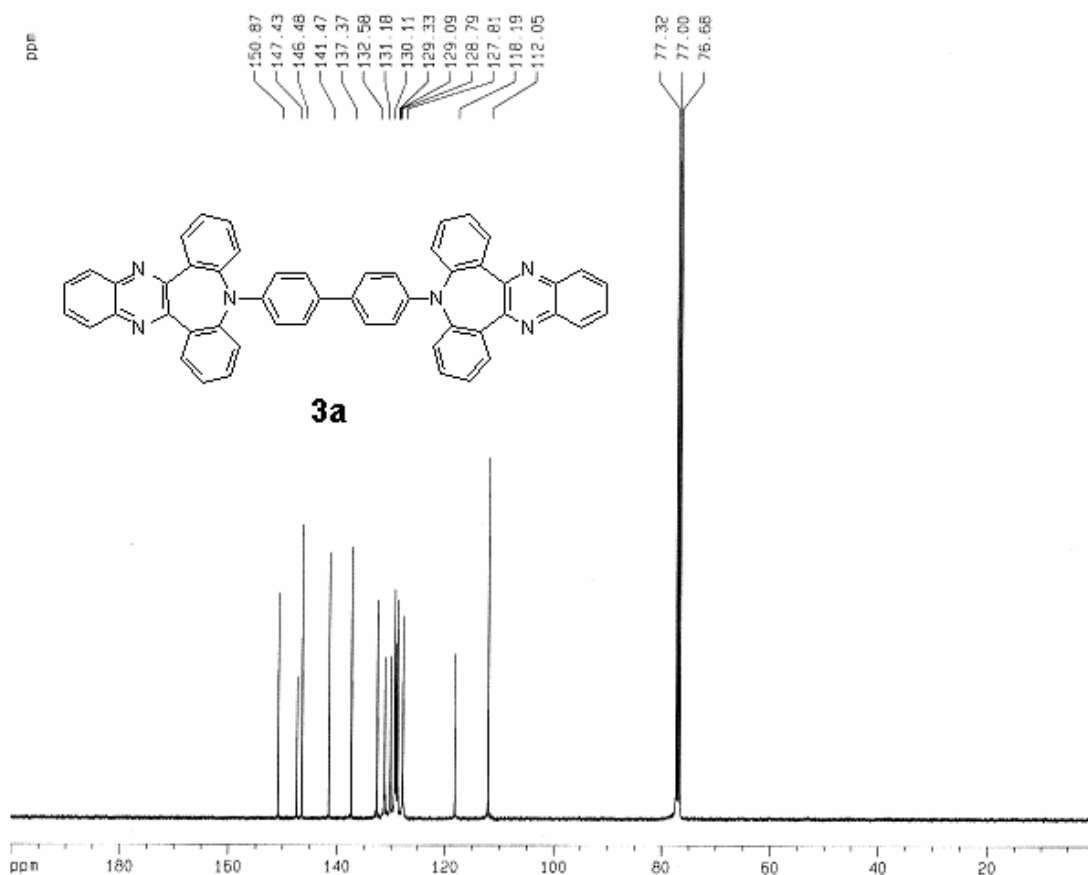

Current Data Parameters  
 NAME 0-2  
 EXPNO 2  
 PROCNO 1

F2 - Acquisition Parameters  
 Date\_ 20021104  
 Time 19.43  
 INSTRUM spect  
 PROBHD 5 mm BBO BB-1H  
 PULPROG zgpg30  
 TD 65536  
 SOLVENT cdc13  
 NS 14136  
 DS 0  
 SMH 25125.629 Hz  
 FIDRES 0.383387 Hz  
 AQ 1.3042164 sec  
 RG 361.3  
 CW 19.90 usec  
 DE 6.50 usec  
 FE 300.0 K  
 D1 1.20000005 sec  
 d11 0.03000000 sec  
 d12 0.00000000 sec

\*\*\*\*\* CHANNEL f1 \*\*\*\*\*  
 NUC1 13C  
 P1 5.50 usec  
 PL1 0.00 dB  
 SFO1 100.6242995 MHz

\*\*\*\*\* CHANNEL f2 \*\*\*\*\*  
 CPDPRG2 waltz16  
 NUC2 1H  
 PCPD2 90.00 usec  
 PL2 120.00 dB  
 PL12 20.50 dB  
 PL13 23.00 dB  
 SFO2 400.1319000 MHz

F2 - Processing parameters  
 SI 32768  
 SF 100.6127736 MHz  
 WMW LM  
 SSB 0  
 LB 1.00 Hz  
 GB 0  
 PC 1.40

ID NMR plot parameters  
 CX 20.00 cm  
 CY 7.00 cm  
 F1P 200.000 ppm  
 F1 20122.55 Hz  
 F2P 0.000 ppm  
 F2 0.00 Hz  
 PRNCH 10.00000 mm/cm

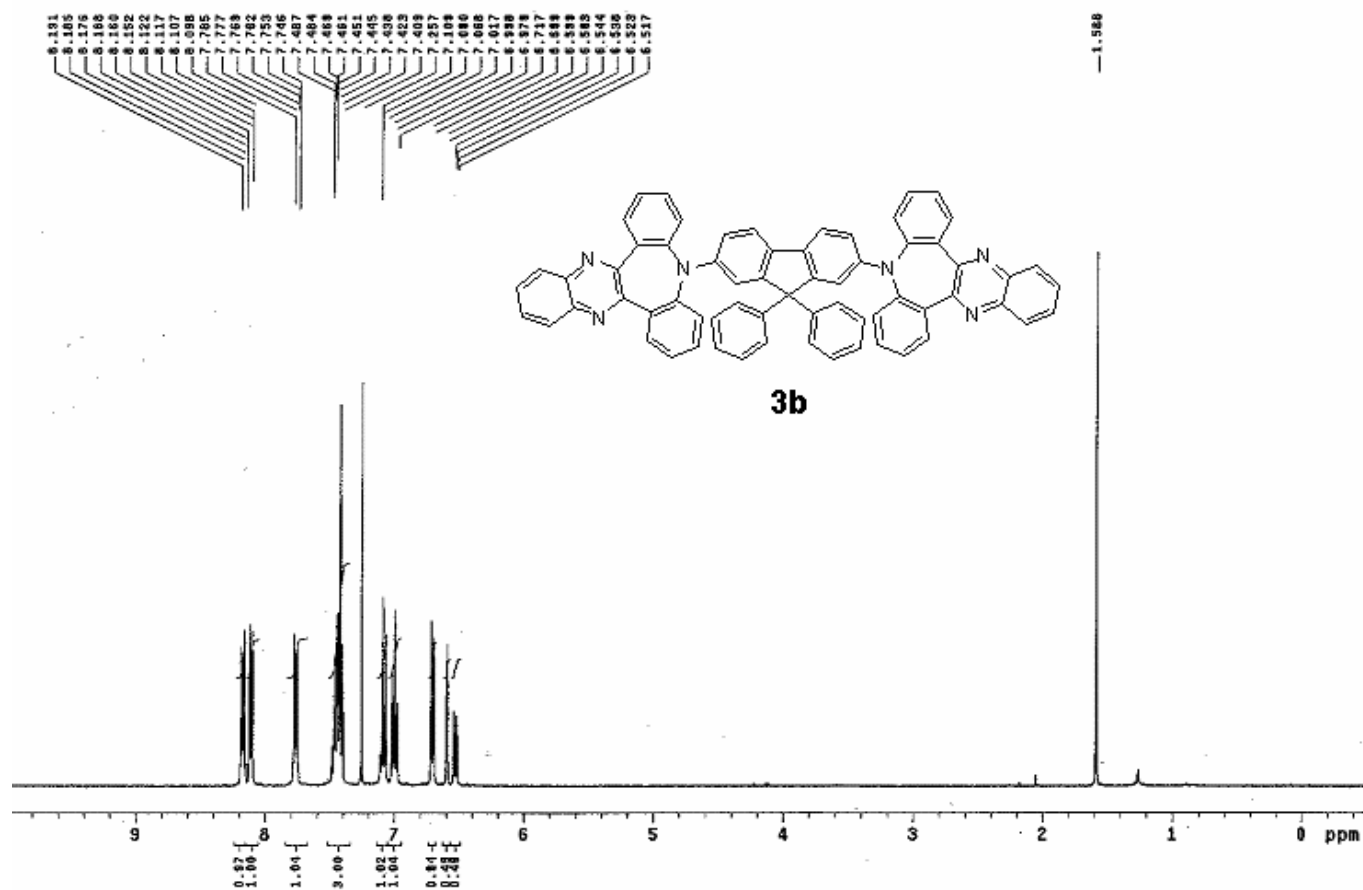

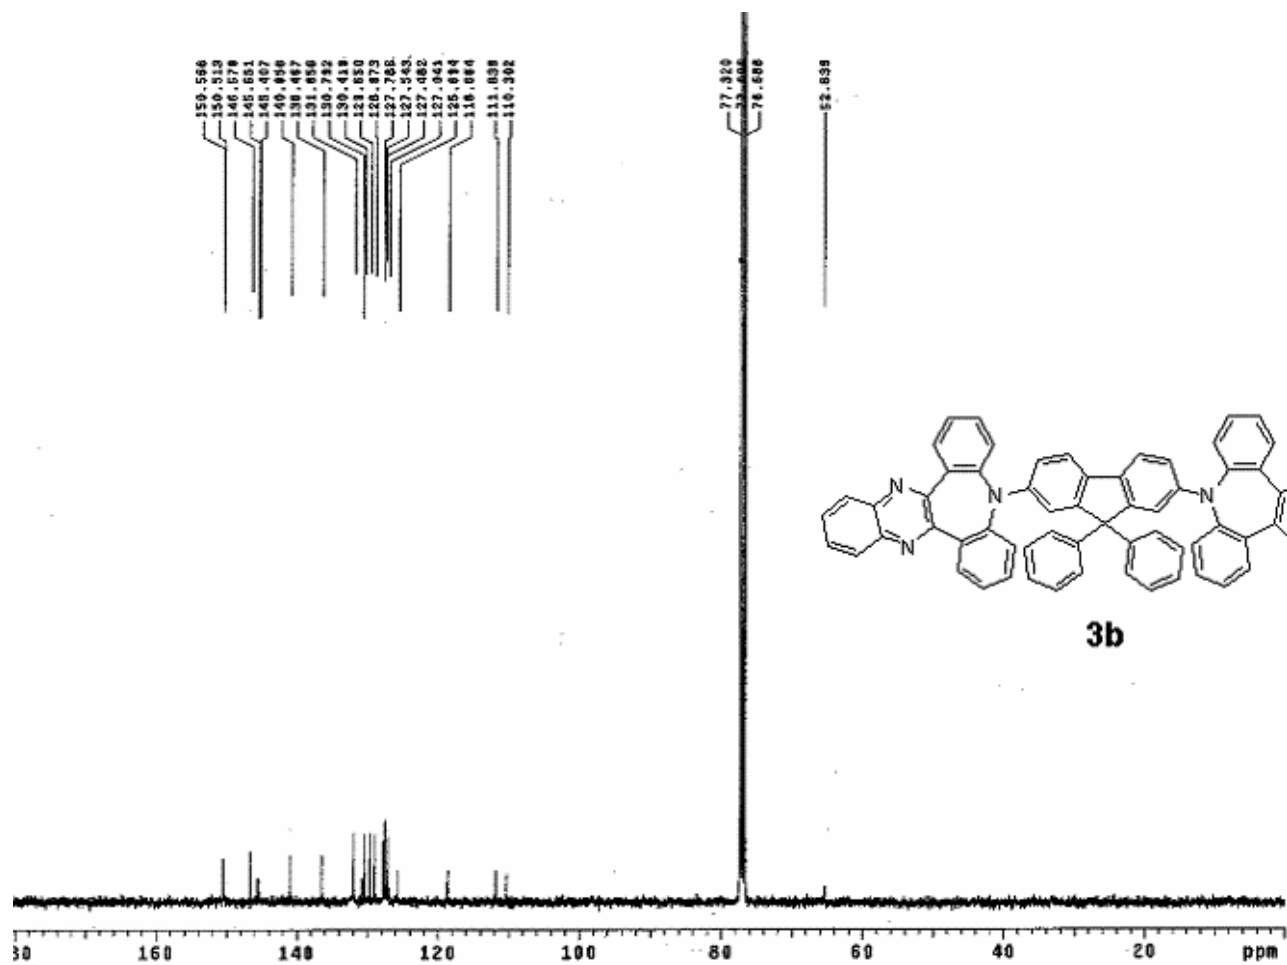

Supplement: b506409k-(b).pdf [file b506409k-%28b%29.pdf]
